# Supplementary material for: Apelin receptor upregulation in spontaneously hypertensive rat contributes to the enhanced vascular smooth muscle cell proliferation by activating autophagy
Source: PubMed Central journal article supplement — Ann Transl Med. 2021 Apr;9(8):627. doi: 10.21037/atm-20-6891 (PMC8106044; doi:10.21037/atm-20-6891), 2021-04
Supplement: atm-09-08-627-supplementary.pdf [file atm-09-08-627-supplementary.pdf]

**Table S1** Primers for real-time quantitative PCR analysis

|        | Primer  | Sequences                      |
|--------|---------|--------------------------------|
| Apelin | Forward | 5'-TCTGGCTCTCCTTGACTG-3'       |
|        | Reverse | 5'-AGGCATGGGTCCCTTATG-3'       |
| APJ    | Forward | 5'-GGAAGATGATGGTTACAACACTAC-3' |
|        | Reverse | 5'-AGGCTGGCAATGAAGATG-3'       |
| GAPDH  | Forward | 5'-AGGTCGGTGTGAACGGATTTG-3'    |
|        | Reverse | 5'-TGTAGACCATGTAGTTGAGGTCA-3'  |

APJ, apelin receptor.

**Table S2** Antibodies for Western blot or immunohistochemistry

|                      | No.        | Source                                      |
|----------------------|------------|---------------------------------------------|
| Anti-apelin          | DF13350    | Affinity Biosciences, Cincinnati, OH, USA   |
| Anti-APJ             | 20341-1-AP | Protein Tech Group Inc, Chicago, IL, USA    |
| Anti-PCNA            | 10205-2-AP | Protein Tech Group Inc, Chicago, IL, USA    |
| Anti-GAPDH           | 60004-1-Ig | Protein Tech Group Inc, Chicago, IL, USA    |
| Anti- $\beta$ -actin | 4970       | Cell Signaling Technology, Beverly, MA, USA |
| Anti-LC3B            | 3868       | Cell Signaling Technology, Beverly, MA, USA |
| Anti- $\alpha$ -SMA  | 48938      | Cell Signaling Technology, Beverly, MA, USA |
| Anti-ATG5            | 12994      | Cell Signaling Technology, Beverly, MA, USA |
| Anti-p62             | 5114       | Cell Signaling Technology, Beverly, MA, USA |

APJ, apelin receptor; PCNA, proliferating cell nuclear antigen; LC3B, microtubule-associated protein-1 light chain-3B;  $\alpha$ -SMA,  $\alpha$ -smooth muscle actin; ATG5, autophagy related protein 5.
